# Supplementary material for: Antioxidative Defense, Suppressed Nitric Oxide Accumulation, and Synthesis of Protective Proteins in Roots and Leaves Contribute to the Desiccation Tolerance of the Resurrection Plant Haberlea rhodopensis
Source: MDPI journal article supplement (doi:10.3390/plants12152834), 2023-07-31
Supplement: s1 [file s1]

# Antioxidative Defense, Suppressed Nitric Oxide Accumulation, and Synthesis of Protective Proteins in Roots and Leaves Contribute to the Desiccation Tolerance of the Resurrection Plant *Haberlea rhodopensis*

Katya Georgieva <sup>1,\*</sup>, Gergana Mihailova <sup>1</sup>, Liliana Gigova <sup>1</sup>, Antoaneta V. Popova <sup>2</sup>, Maya Velitchkova <sup>2</sup>, Lyudmila Simova-Stoilova <sup>1</sup>, Máté Sági-Kazár <sup>3,4</sup>, Helga Zelenyánszki <sup>3,4</sup>, Katalin Solymosi <sup>5</sup> and Ádám Solti <sup>3</sup>

<sup>1</sup> Institute of Plant Physiology and Genetics, Bulgarian Academy of Sciences, Academic Georgi Bonchev Str., Building 21, 1113 Sofia, Bulgaria; gmihailova@bio21.bas.bg (G.M.); gigova01@gmail.com (L.G.); lsimova@mail.bg (L.S.-S.)

<sup>2</sup> Institute of Biophysics and Biomedical Engineering, Bulgarian Academy of Sciences, Academic Georgi Bonchev Str., Building 21, 1113 Sofia, Bulgaria; popova@bio21.bas.bg (A.V.P.); mayav@bio21.bas.bg (M.V.)

<sup>3</sup> Department of Plant Physiology and Molecular Plant Biology, Institute of Biology, ELTE Eötvös Loránd University, Pázmány Péter Sétány 1/C, H-1117 Budapest, Hungary; sagi.kazar.mate@ttk.elte.hu (M.S.-K.); helga.zelenyanszki@ttk.elte.hu (H.Z.); adam.solti@ttk.elte.hu (Á.S.)

<sup>4</sup> Doctoral School of Biology, Institute of Biology, ELTE Eötvös Loránd University, Pázmány Péter Sétány 1/C, H-1117 Budapest, Hungary

<sup>5</sup> Department of Plant Anatomy, Institute of Biology, ELTE Eötvös Loránd University, Pázmány Péter Sétány 1/C, H-1117 Budapest, Hungary; katalin.solymosi@ttk.elte.hu

\* Correspondence: katya@bio21.bas.bg or georgieva.katya.m@gmail.com; Tel.: +359-2-979-2620

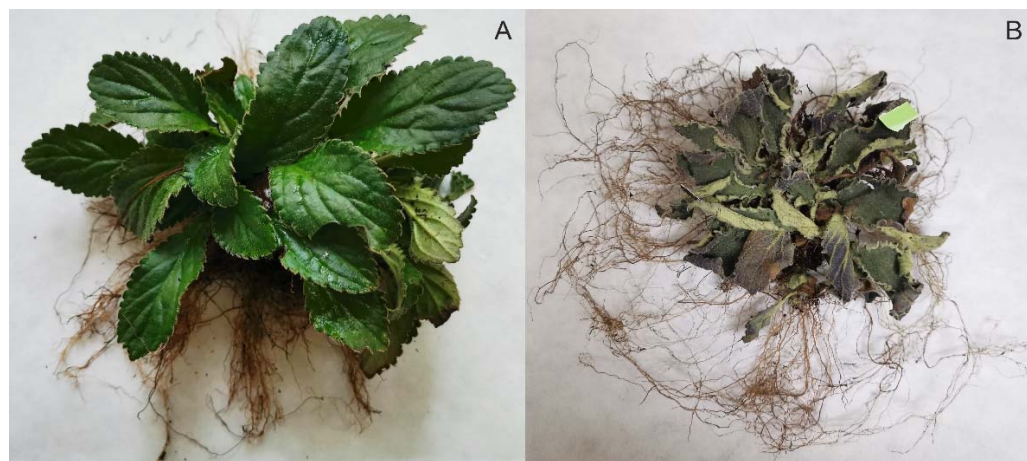

**Figure S1.** *H. rhodopensis* leaves and roots in well-hydrated (A) and air-dry state (B).

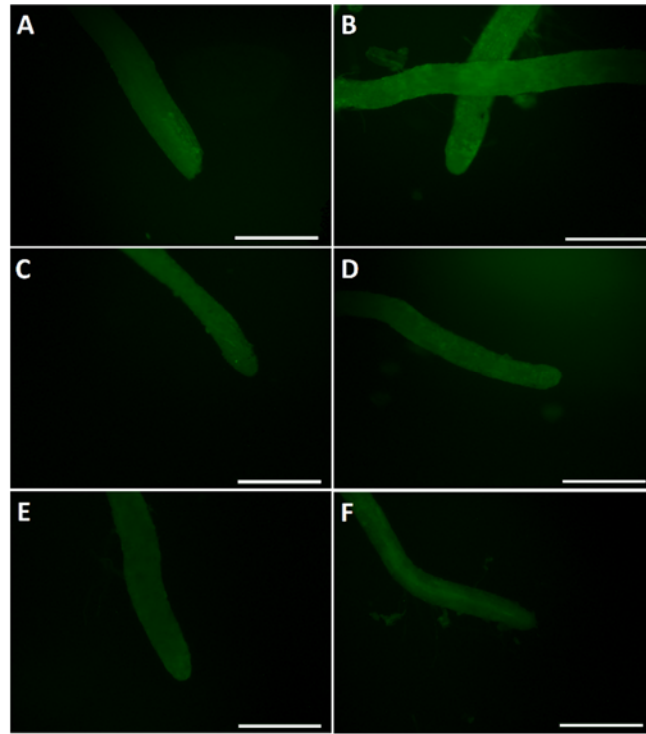

**Figure S2.** Nitric oxide accumulation in the apical zone of *H. rhodopensis* roots detected by the auto-fluorescence of 4-amino-5-methylamino-2',7'-difluorofluorescein (DAF-FM) NO conjugates. A: RC; B: RD0; C: RD1; D: RD3; E: RD4; F: RR; where roots (R) were analyzed in well-hydrated control (C) stage, and during desiccation (D1-D4) and after 6 days of rehydration (RR), according to Table 1. RD0 is a supplementary sample that was taken at WC of  $1.92 \pm 0.05$  (g H<sub>2</sub>O) (g DW<sup>-1</sup>) as for an intermediate sample at the RC-RD1 transition. Bars are equal to 1 mm.

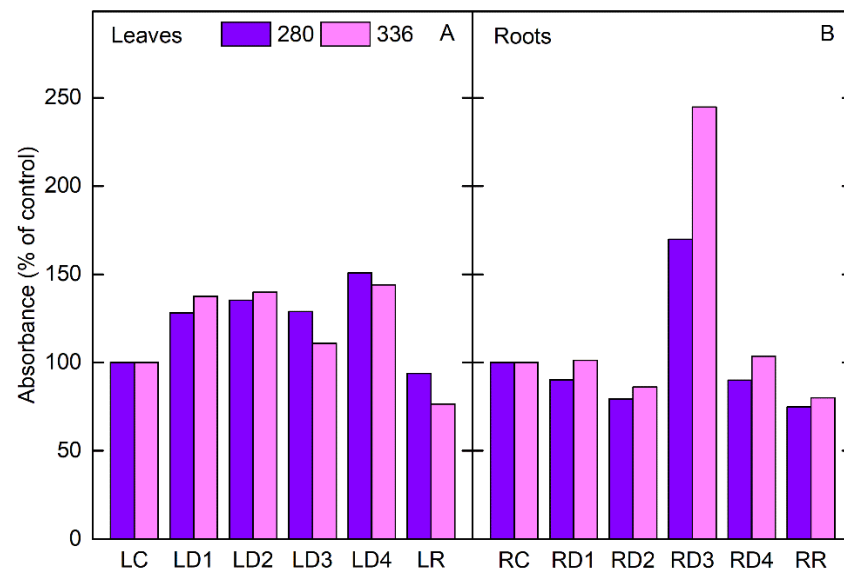

**Figure S3.** Changes in the absorbance at 280 nm and 336 nm of the extracts from leaves (L; A) and roots (R; B) from well-hydrated (LC, RC), dehydrated to different extent (LD1–LD4; RD1–RD4) and fully rehydrated (LR, RR) *H. rhodopensis* samples, according to Table 1. The values are presented as percentage (%) from the absorbance registered for fully hydrated plants.
